# Supplementary material for: Mortality, Severity, and Hospital Admission among COVID-19 Patients with ACEI/ARB Use: A Meta-Analysis Stratifying Countries Based on Response to the First Wave of the Pandemic
Source: MDPI journal article supplement (doi:10.3390/healthcare9020127), 2021-01-28

## Supplementary Online Content

**Table S1.** Corpus of studies included in meta-analysis (search closing date of 4 July 2020).

**Appendix to Table S1:** Publications included in the meta-analysis

**Fig. S1:** PRISMA flowchart.

**Fig. S2:** Funnel plots (A) mortality, (B) severity of COVID-19 disease, and (C) hospitalization.

**Table S1.** Corpus of studies included in meta-analysis (search closing date of 4 July 2020; citations in Appendix to this Table).

| Study                         | Country | Design                                            | Study Period               | ACEI/ARB | Non-ACEI/ARB | Outcomes of interest                                                           | Statistical adjustments                                                                             | NOS |
|-------------------------------|---------|---------------------------------------------------|----------------------------|----------|--------------|--------------------------------------------------------------------------------|-----------------------------------------------------------------------------------------------------|-----|
| Bean et al <sup>1</sup>       | UK      | Multi-center retrospective study                  | 1st Mar to 13th Apr, 2020  | 399      | 801          | Mortality<br>Severity (death or organ support within 21-days of symptom onset) | Mortality: none<br>Severity: age, sex, comorbidities                                                | 7   |
| Bravi et al <sup>2</sup>      | Italy   | Population-based case-control retrospective study | Up to 24th Apr, 2020       | 450      | 1152         | Severity (requiring ICU or causing death)                                      | Severity: age, gender, diabetes, major cardiovascular diseases, COPD, cancer, renal diseases        | 7   |
| Chen et al <sup>3</sup>       | China   | Single-center retrospective study                 | 1st Jan to Mar 17th, 2020  | 32       | 39           | Mortality                                                                      | None                                                                                                | 5   |
| Conversano et al <sup>4</sup> | Italy   | Single-center retrospective study                 | 27th Feb to 17th Mar, 2020 | -        | -            | Mortality                                                                      | None                                                                                                | 5   |
| Felice et al <sup>5</sup>     | Italy   | Single-center retrospective study                 | 9th Mar to 31st Mar 2020   | 82       | 51           | Mortality<br>Severity (requiring semi ICU or ICU)<br>Hospitalization           | Mortality, severity, hospitalization: age, gender, BMI, days with symptoms, previous cardiovascular | 8   |
| Feng et al <sup>6</sup>       | China   | Multi-center retrospective study                  | 1st Jan to 15th Feb 2020   | 35       | 62           | Severity (National Health Commission of China definition)                      | None                                                                                                | 5   |

|                             |         |                                                           |                            |     |      |                                                                        |                                                                                                                                                                                        |   |
|-----------------------------|---------|-----------------------------------------------------------|----------------------------|-----|------|------------------------------------------------------------------------|----------------------------------------------------------------------------------------------------------------------------------------------------------------------------------------|---|
| Fosbøl et al <sup>7</sup>   | Denmark | National registry retrospective cohort study              | 1st Feb to 4th May, 2020   | 895 | 3585 | Mortality<br>Severity (unclear definition)                             | Mortality, severity: age, sex, comorbidities                                                                                                                                           | 9 |
| Gao et al <sup>8</sup>      | China   | Single-center retrospective observational study           | 5th Feb to 15th Mar, 2020  | 183 | 527  | Mortality<br>Severity (unclear definition)                             | Mortality, severity: propensity score matched for age, sex, diabetes, insulin-treated diabetes, myocardial infarction, underwent PCI/CABG, renal failure, stroke, heart failure, COPD. | 8 |
| Guo et al <sup>9</sup>      | China   | Single-center retrospective study                         | 23th Jan to 23th Feb, 2020 | 19  | 168  | Mortality                                                              | None                                                                                                                                                                                   | 4 |
| Huang et al <sup>10</sup>   | China   | Single-center retrospective study                         | 7th Feb to 3rd Mar, 2020   | 20  | 30   | Mortality<br>Severity (National Health Commission of China definition) | None                                                                                                                                                                                   | 4 |
| Jung et al <sup>11</sup>    | Korea   | Retrospective observational data from nationwide database | Up to 8th Apr, 2020.       | 377 | 1577 | Mortality (in-hospital death)                                          | Mortality: age, sex, Charlson Comorbidity Index, immunosuppression                                                                                                                     | 7 |
| Li et al <sup>12</sup>      | China   | Single-center retrospective case series                   | 15th Jan to 15th Mar, 2020 | 115 | 247  | Mortality<br>Severity (National Health Commission of China definition) | None                                                                                                                                                                                   | 4 |
| Liabeuf et al <sup>13</sup> | France  | Single-center retrospective study                         | Feb 28th to 30th Mar, 2020 | 96  | 172  | Mortality<br>Severity (admission to ICU)                               | Mortality: none<br>Severity: comorbidities                                                                                                                                             | 4 |

|                                 |       |                                                  |                             |      |       |                                                                     |                                                                                                                        |   |
|---------------------------------|-------|--------------------------------------------------|-----------------------------|------|-------|---------------------------------------------------------------------|------------------------------------------------------------------------------------------------------------------------|---|
| Li Xiaochen et al <sup>14</sup> | China | Single-center ambispective cohort study          | Jan 26th to Feb 5th, 2020   | 42   | 503   | Severity (IDSA Pneumonia severity)                                  | None                                                                                                                   | 4 |
| Liu Y et al <sup>15</sup>       | China | Multi-center retrospective study                 | Jan 11th to Feb 5th, 2020   | 12   | 34    | Severity (National Health Commission of China definition)           | Severity: sex                                                                                                          | 6 |
| Lopez-Otero <sup>16</sup>       | Spain | Single-center retrospective study                | Mar 10th to April 6th, 2020 | 210  | 755   | Mortality Severity (ICU admissions)                                 | Mortality, severity: propensity score matching                                                                         | 8 |
| Mancia et al <sup>17</sup>      | Italy | Population-based case–control study              | Feb 21th to Mar 11th, 2020  | 2896 | 12506 | Severity (defined as critical or fatal disease)                     | Severity: propensity score matching                                                                                    | 9 |
| Mehta et al <sup>18</sup>       | USA   | Multi-center retrospective study                 | Mar 8th to Apr 12th, 2020   | 211  | 1494  | Mortality Severity (admission to ICU) Hospitalization               | Mortality: none Severity, hospitalization: propensity score matching                                                   | 8 |
| Meng et al <sup>19</sup>        | China | Single-center retrospective study                | Jan 11th to Feb 23rd, 2020  | 17   | 25    | Mortality Severity (National Health Commission of China definition) | None                                                                                                                   | 4 |
| Richardson et al <sup>20</sup>  | USA   | Population-based retrospective case series study | Mar 1st to Apr 4th, 2020    | 413  | 953   | Mortality Severity (ICU care)                                       | None                                                                                                                   | 4 |
| Rentsch et al <sup>21</sup>     | USA   | Population-based retrospective cohort            | Feb 8th and Mar 30th, 2020  | 1532 | 2247  | Severity (ICU admission) Hospitalization                            | Severity, hospitalization: age, race, comorbid conditions, and Veterans Aging Cohort Study Index of physiologic injury | 9 |

|                              |       |                                                   |                            |      |      |                                                                        |                                                           |   |
|------------------------------|-------|---------------------------------------------------|----------------------------|------|------|------------------------------------------------------------------------|-----------------------------------------------------------|---|
| Reynolds et al <sup>22</sup> | USA   | Multi-center retrospective cohort study           | Mar 1st to Apr 15th, 2020  | 1774 | 439  | Severity (defined as intensive care, mechanical ventilation, or death) | Propensity score matching                                 | 9 |
| Rossi et al <sup>23</sup>    | Italy | Population-based prospective cohort study         | Feb 27th Up to Apr 8th     | 818  | 4488 | Mortality Hospitalization                                              | Mortality, severity: age, sex, Charlson Comorbidity Index | 8 |
| Tedeschi et al <sup>24</sup> | Italy | Multi-center prospective cohort study             | Feb 1st to Apr 4th, 2020   | 175  | 136  | Mortality                                                              | Mortality: age, gender, presence of comorbidities         | 8 |
| Yang et al <sup>25</sup>     | China | Single-center retrospective study                 | Jan 5th to Feb 22nd, 2020  | 43   | 83   | Mortality Severity (National Health Commission of China definition)    | None                                                      | 4 |
| Yan et al <sup>26</sup>      | China | Population-based retrospective case-control study | Jan 10th to Feb 28th, 2020 | -    | -    | Severity (National Health Commission of China definition)              | Severity: age, sex, BMI                                   | 4 |
| Yu et al <sup>27*</sup>      | China | Multi-center retrospective cohort study           | Jan 17th to Feb 19th, 2020 | 103  | 173  | Mortality                                                              | Mortality: sex, age, smoking, symptoms, chronic diseases  | 9 |
| Zeng et al <sup>28</sup>     | China | Single-center retrospective study                 | Jan 5th to Mar 8th, 2020   | 28   | 47   | Mortality Severity (IDSA Pneumonia severity) Hospitalization           | None                                                      | 4 |
| Zhang et al <sup>29</sup>    | China | Multi-center retrospective study                  | Dec 31st to Feb 20th, 2020 | 174  | 348  | Mortality Severity (ARDS)                                              | Mortality, severity: propensity score matching            | 9 |
| Zhou et al <sup>30</sup>     | China | Single-center retrospective study                 | Jan 25th to Feb 20th, 2020 | 15   | 21   | Mortality                                                              | None                                                      | 4 |

\* Data were not reported separately but merged into the Zhang et al (2020) meta-analysis. Data included here are as reported in the meta-analysis.

### Abbreviations

ACEI: angiotensin converting enzyme inhibitors

ARB: Angiotensin II receptor blockers

ARDS: Acute respiratory distress syndrome

BMI: Body mass index

CABG: Coronary artery bypass surgery

COPD: Chronic obstructive pulmonary disease

ICU: Intensive care unit

IDSA: Infectious Diseases Society of America

PCI: Percutaneous coronary intervention

NOS: Newcastle-Ottawa Scale

### Appendix to Table S1: Publications included in the meta-analysis

### References:

1. Bean DM, Kraljevic Z, Searle T, et al. ACE-inhibitors and Angiotensin-2 Receptor Blockers are not associated with severe SARS-CoV-2 infection in a multi-site UK acute Hospital Trust. *Eur J Heart Fail.* 2020.
2. Bravi F, Flacco ME, Carradori T, et al. Predictors of severe or lethal COVID-19, including Angiotensin Converting Enzyme inhibitors and Angiotensin II Receptor Blockers, in a sample of infected Italian citizens. *PLoS One.* 2020;15(6):e0235248.
3. Chen Y, Yang D, Cheng B, et al. Clinical Characteristics and Outcomes of Patients With Diabetes and COVID-19 in Association With Glucose-Lowering Medication. *Diabetes Care.* 2020;43(7):1399-1407.
4. Andrea C, Francesco M, Antonio N, et al. Renin-Angiotensin-Aldosterone System Inhibitors and Outcome in Patients With SARS-CoV-2 Pneumonia: A Case Series Study. *Hypertension.* 2020;76(2):e10-e12.
5. Felice C, Nardin C, Di Tanna GL, et al. Use of RAAS inhibitors and risk of clinical deterioration in COVID-19: results from an Italian cohort of 133 hypertensives. *Am J Hypertens.* 2020.
6. Feng Y, Ling Y, Bai T, et al. COVID-19 with Different Severities: A Multicenter Study of Clinical Features. *Am J Respir Crit Care Med.* 2020;201(11):1380-1388.
7. Fosbøl EL, Butt JH, Østergaard L, et al. Association of Angiotensin-Converting Enzyme Inhibitor or Angiotensin Receptor Blocker Use With COVID-19 Diagnosis and Mortality. *JAMA.* 2020.
8. Gao C, Cai Y, Zhang K, et al. Association of hypertension and antihypertensive treatment with COVID-19 mortality: a retrospective observational study. *Eur Heart J.* 2020;41(22):2058-2066.
9. Guo T, Fan Y, Chen M, et al. Cardiovascular Implications of Fatal Outcomes of Patients With Coronavirus Disease 2019 (COVID-19). *JAMA Cardiol.* 2020.
10. Huang Z, Cao J, Yao Y, et al. The effect of RAS blockers on the clinical characteristics of COVID-19 patients with hypertension. *Ann Transl Med.* 2020;8(7):430.
11. Jung SY, Choi JC, You SH, Kim WY. Association of renin-angiotensin-aldosterone system inhibitors with COVID-19-related outcomes in Korea: a nationwide population-based cohort study. *Clin Infect Dis.* 2020.
12. Li J, Wang X, Chen J, Zhang H, Deng A. Association of Renin-Angiotensin System Inhibitors With Severity or Risk of Death in Patients With Hypertension Hospitalized for Coronavirus Disease 2019 (COVID-19) Infection in Wuhan, China. *JAMA Cardiol.* 2020.
13. Liabeuf S, Moraghy J, Bennis Y, et al. Association between renin-angiotensin system inhibitors and COVID-19 complications. *Eur Heart J Cardiovasc Pharmacother.* 2020.
14. Li X, Xu S, Yu M, et al. Risk factors for severity and mortality in adult COVID-19 inpatients in Wuhan. *J Allergy Clin Immunol.* 2020;146(1):110-118.
15. Liu Y, Huang F, Xu J, et al. Anti-hypertensive Angiotensin II receptor blockers associated to mitigation of disease severity in elderly COVID-19 patients. *medRxiv.* 2020:2003.2020.20039586.
16. López-Otero D, López-Pais J, Cacho-Antonio CE, et al. Impact of angiotensin-converting enzyme inhibitors and angiotensin receptor blockers on COVID-19 in a western population. CARDIOVID registry. *Rev Esp Cardiol (Engl Ed).* 2020.
17. Mancia G, Rea F, Ludergnani M, Apolone G, Corrao G. Renin-Angiotensin-Aldosterone System Blockers and the Risk of Covid-19. *New England Journal of Medicine.* 2020;382(25):2431-2440.

18. Mehta N, Kalra A, Nowacki AS, et al. Association of Use of Angiotensin-Converting Enzyme Inhibitors and Angiotensin II Receptor Blockers With Testing Positive for Coronavirus Disease 2019 (COVID-19). *JAMA Cardiol.* 2020.
19. Meng J, Xiao G, Zhang J, et al. Renin-angiotensin system inhibitors improve the clinical outcomes of COVID-19 patients with hypertension. *Emerg Microbes Infect.* 2020;9(1):757-760.
20. Richardson S, Hirsch JS, Narasimhan M, et al. Presenting Characteristics, Comorbidities, and Outcomes Among 5700 Patients Hospitalized With COVID-19 in the New York City Area. *JAMA.* 2020.
21. Rentsch CT, Kidwai-Khan F, Tate JP, et al. Covid-19 Testing, Hospital Admission, and Intensive Care Among 2,026,227 United States Veterans Aged 54-75 Years. *medRxiv.* 2020.
22. Reynolds HR, Adhikari S, Pulgarin C, et al. Renin-Angiotensin-Aldosterone System Inhibitors and Risk of Covid-19. *N Engl J Med.* 2020;382(25):2441-2448.
23. Giorgi Rossi P, Marino M, Formisano D, Venturelli F, Vicentini M, Grilli R. Characteristics and outcomes of a cohort of SARS-CoV-2 patients in the Province of Reggio Emilia, Italy. *medRxiv.* 2020:2020.2004.2013.20063545.
24. Tedeschi S, Giannella M, Bartoletti M, et al. Clinical Impact of Renin-angiotensin System Inhibitors on In-hospital Mortality of Patients With Hypertension Hospitalized for Coronavirus Disease 2019. *Clinical Infectious Diseases.* 2020.
25. Yang G, Tan Z, Zhou L, et al. Effects of Angiotensin II Receptor Blockers and ACE (Angiotensin-Converting Enzyme) Inhibitors on Virus Infection, Inflammatory Status, and Clinical Outcomes in Patients With COVID-19 and Hypertension: A Single-Center Retrospective Study. *Hypertension.* 2020;76(1):51-58.
26. Yan H, Valdes AM, Vijay A, et al. Role of Drugs Affecting the Renin-Angiotensin-Aldosterone System on Susceptibility and Severity of COVID-19: A Large Case-Control Study from Zhejiang Province, China. *medRxiv.* 2020:2020.2004.2024.20077875.
27. Zhang X, Yu J, Pan LY, Jiang HY. ACEI/ARB use and risk of infection or severity or mortality of COVID-19: A systematic review and meta-analysis. *Pharmacol Res.* 2020;158:104927.
28. Zeng Z, Sha T, Zhang Y, et al. Hypertension in patients hospitalized with COVID-19 in Wuhan, China: A single-center retrospective observational study. *medRxiv.* 2020:2020.2004.2006.20054825.
29. Zhang P, Zhu L, Cai J, et al. Association of Inpatient Use of Angiotensin-Converting Enzyme Inhibitors and Angiotensin II Receptor Blockers With Mortality Among Patients With Hypertension Hospitalized With COVID-19. *Circ Res.* 2020;126(12):1671-1681.
30. Zhou X, Zhu J, Xu T. Clinical characteristics of coronavirus disease 2019 (COVID-19) patients with hypertension on renin-angiotensin system inhibitors. *Clin Exp Hypertens.* 2020;42(7):656-660.

Fig. S1: PRISMA flowchart

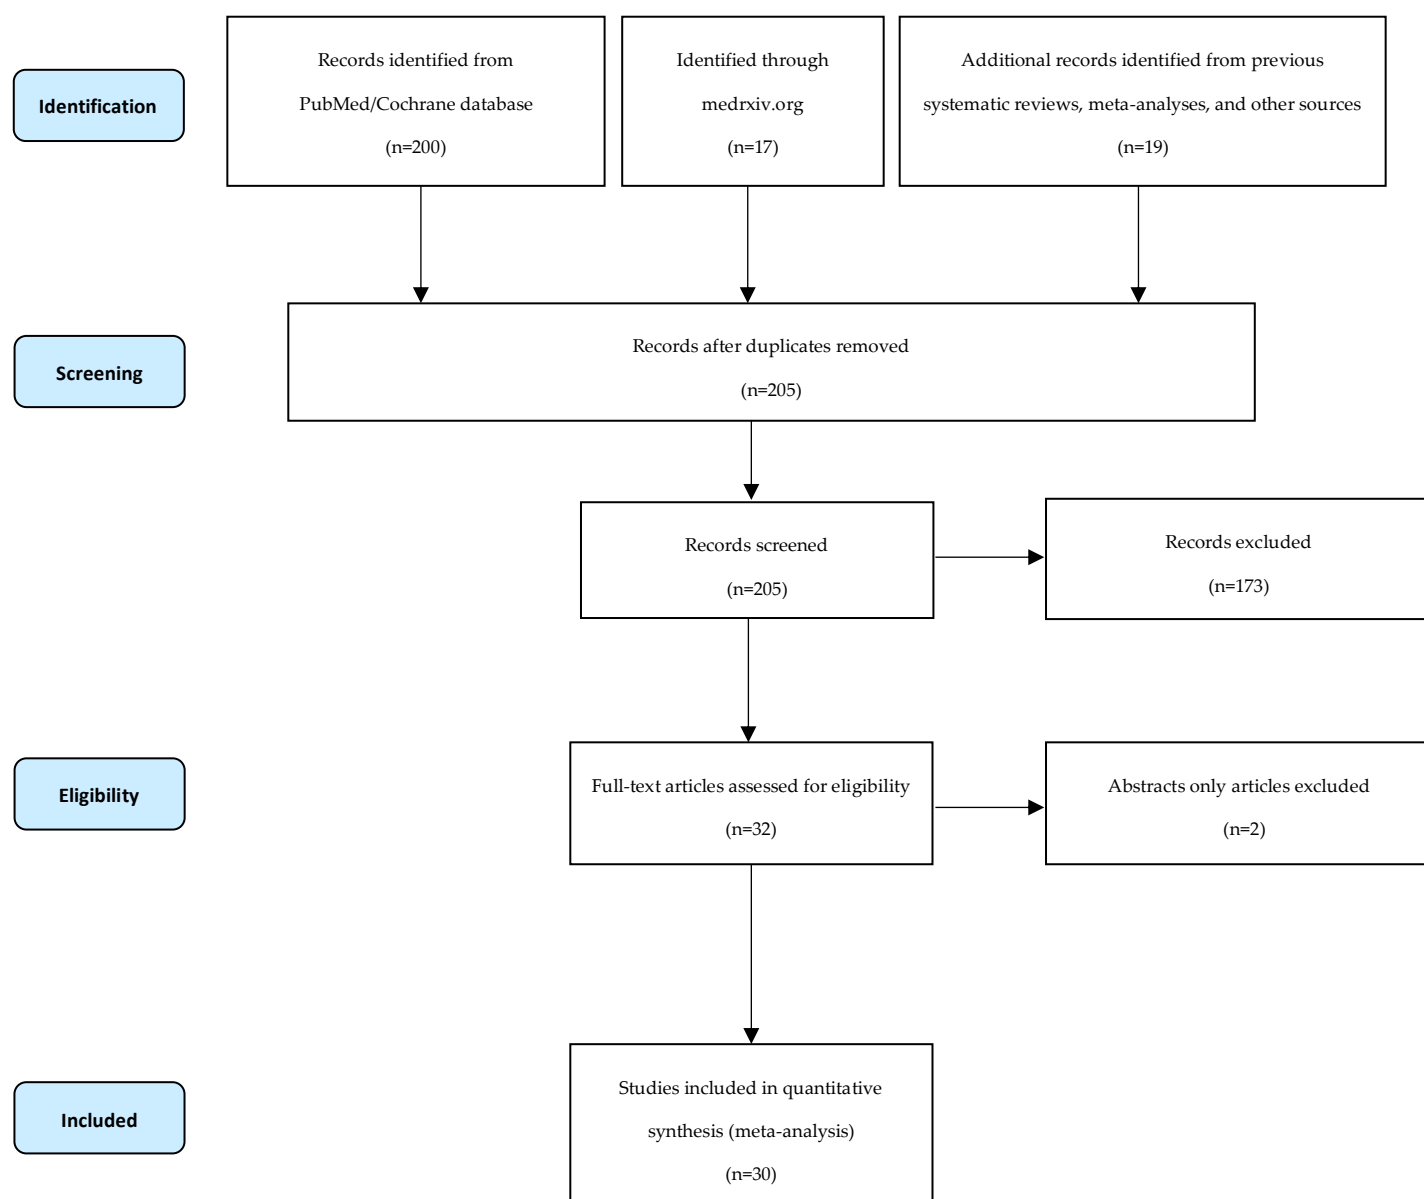

**Figure Legend**

Figure. S2: Funnel plots (A) mortality, (B) severity of COVID-19 disease, and (C) hospitalization.

Panel A: Mortality

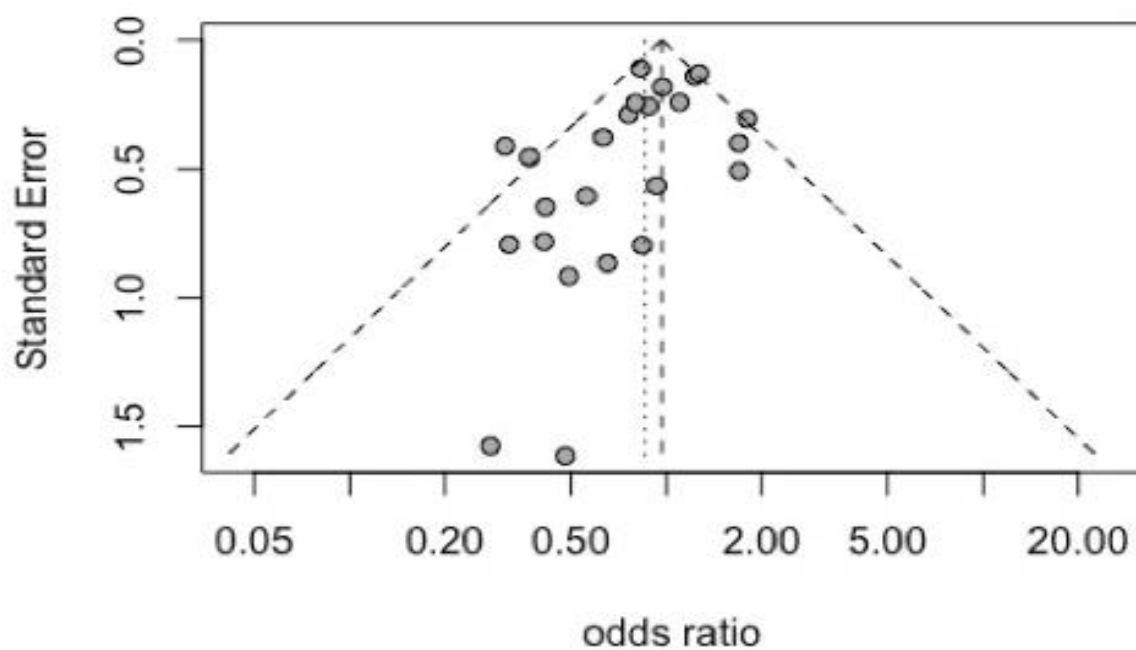



Panel B: Severity

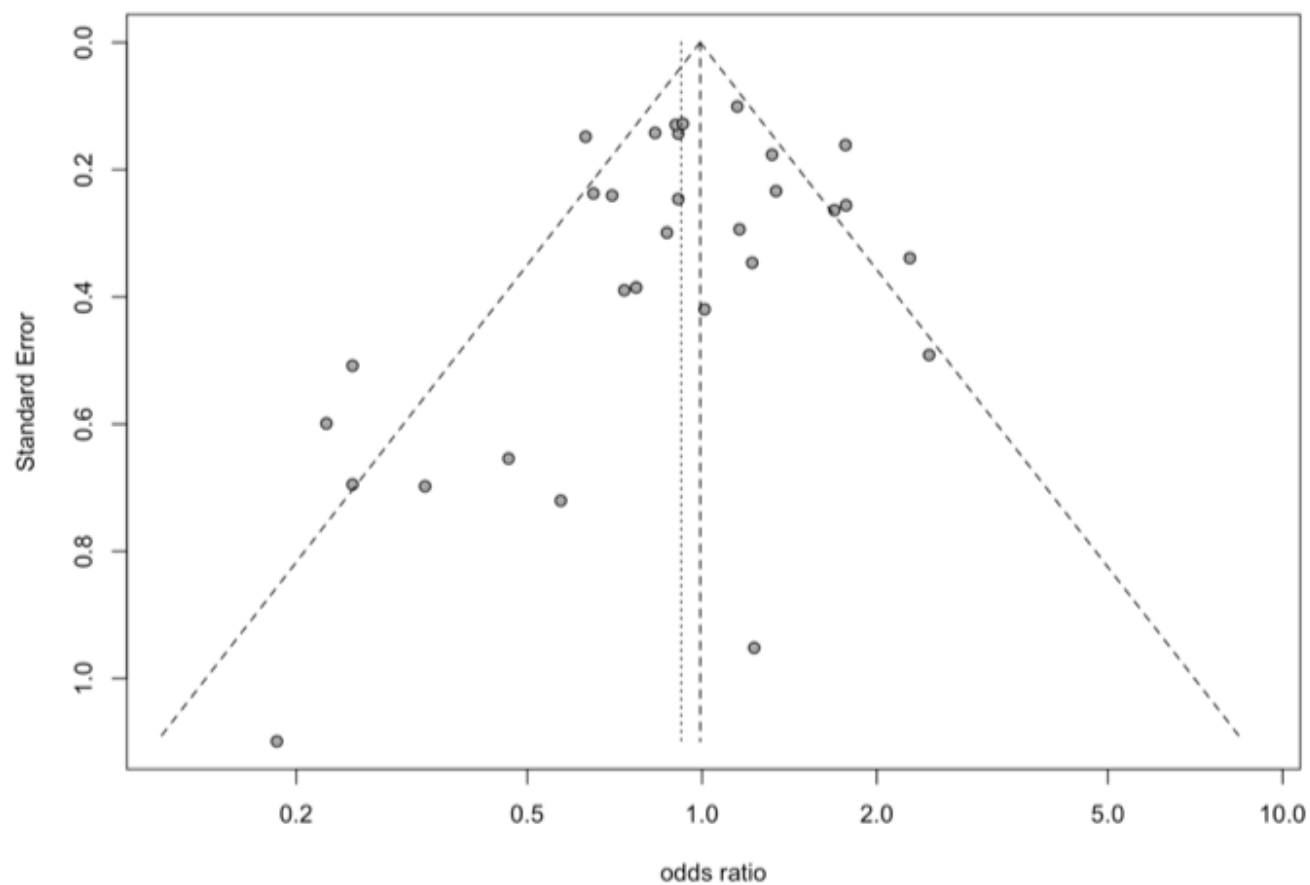

Panel C: Hospitalization

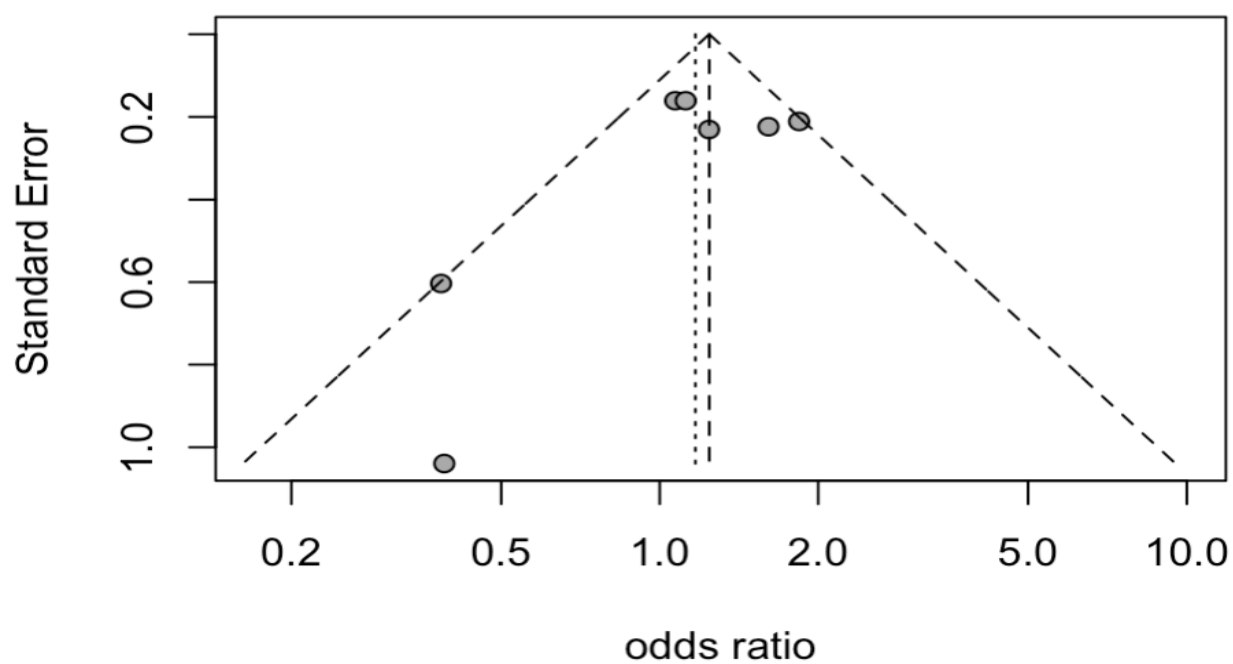

Supplement: s1 [file s1]
